# Supplementary material for: Colorimetric detection of influenza A virus using antibody-functionalized gold nanoparticles
Source: Royal Society of Chemistry journal article supplement (doi:10.1039/c5an00407a), 2015-01-01
Supplement: c5an00407a1.pdf [file c5an00407a1.pdf]

**Supporting Information**

**Colorimetric Detection of Influenza A Virus Using Antibody-Functionalized Gold**

**Nanoparticles**

Yuanjian Liu,<sup>‡</sup><sup>a</sup> Linqun Zhang,<sup>‡</sup><sup>a</sup> Wei Wei,<sup>a\*</sup> Hongyu Zhao,<sup>b</sup> Zhenxian Zhou,<sup>b</sup> Yuanjian Zhang,<sup>a</sup>

Songqin Liu <sup>a</sup>

<sup>a</sup>*Jiangsu Province Hi-Tech Key Laboratory for Bio-medical Research, School of Chemistry and Chemical Engineering, Southeast University, Jiangning District, Nanjing, 211189, PR China*

<sup>b</sup>*Central Laboratory, The Second Affiliated Hospital of Southeast University, Gulou District, Nanjing, 210003, PR China*

\*Corresponding author at: School of Chemistry and Chemical Engineering, Southeast University, Nanjing, 211189, PR China. Tel.: 86-25-52090613; Fax: 86-25-52090618.

*E-mail addresses: weiw@seu.edu.cn (W. Wei)*

<sup>‡</sup> Y.J. Liu and L.Q. Zhang have contributed to this work equally.

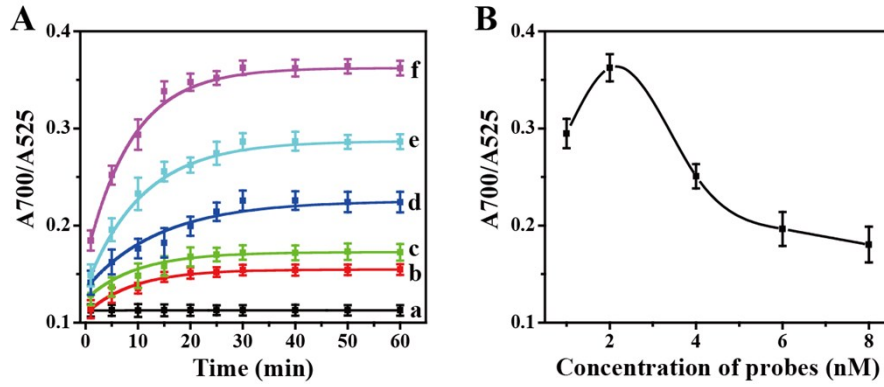

**Fig. S1.** (A) The absorption ratio of mAb-AuNPs bound to the H3N2 with different incubation times at different virus concentrations (0, 10, 20, 40, 60, 80 HAU from a to f in order). (B) Plots of changes in the absorption ratio ( $A_{700}/A_{525}$ ) of probes in different concentration (1nM ~ 8nM) after the addition of virus (80 HAU in 250  $\mu$ L). Error bars show the standard deviation of three experiments.

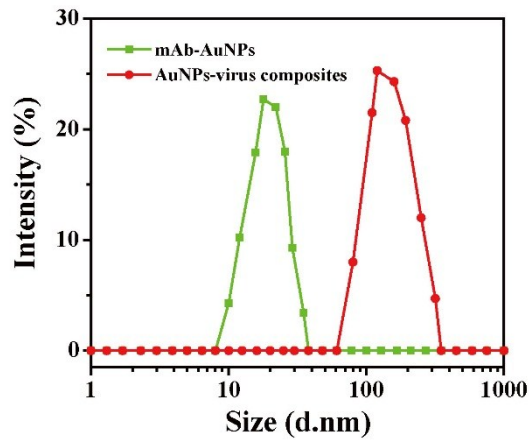

**Fig. S2.** The dynamic light scattering (DLS) characterization for the mAb-AuNPs and their assemblies with H3N2 IAV as a target.
